# Supplementary figures and images for: The B-RafV600E inhibitor dabrafenib selectively inhibits RIP3 and alleviates acetaminophen-induced liver injury
Source: PubMed Central journal article supplement — Cell Death Dis. 2014 Jun 5;5(6):e1278–. doi: 10.1038/cddis.2014.241 (PMC4611716; doi:10.1038/cddis.2014.241), 2014-06-05

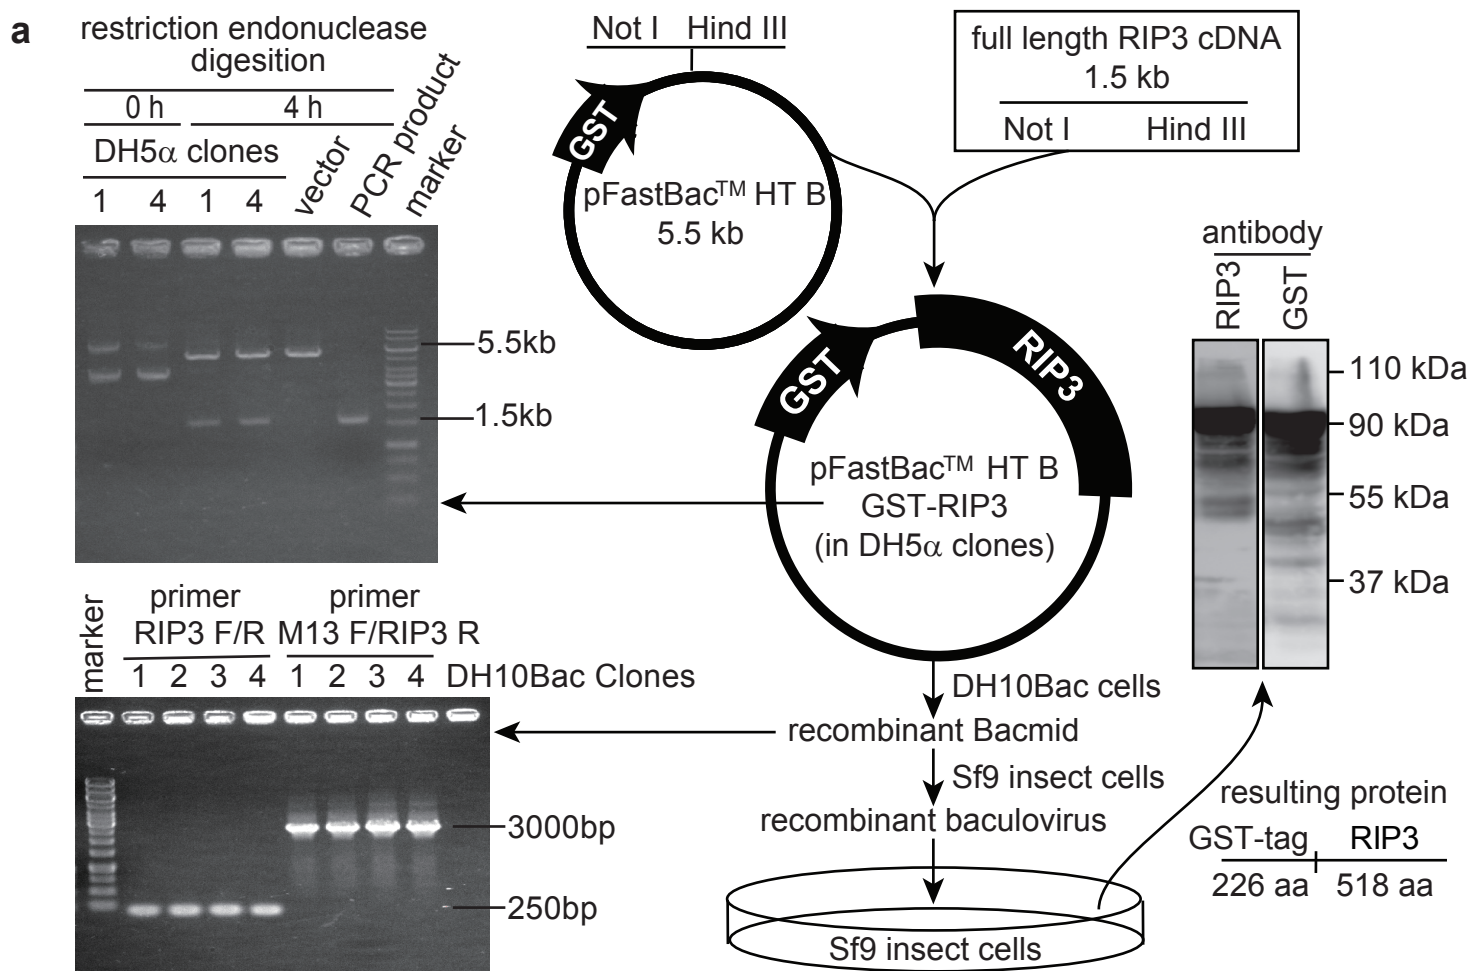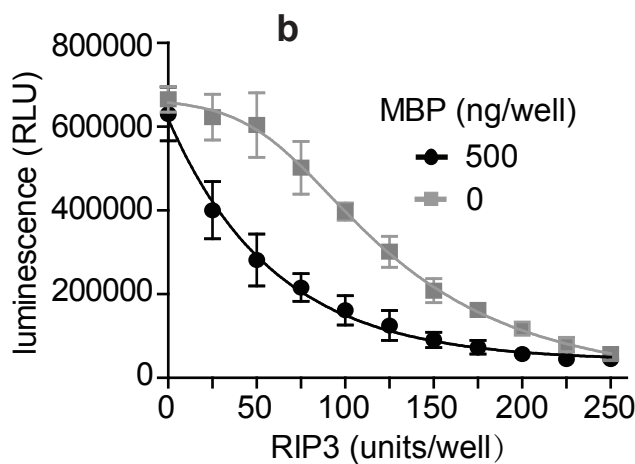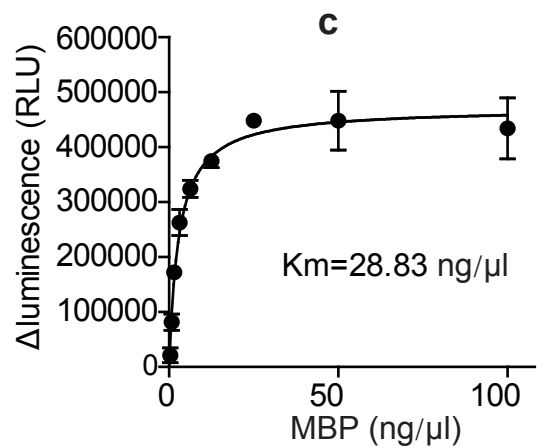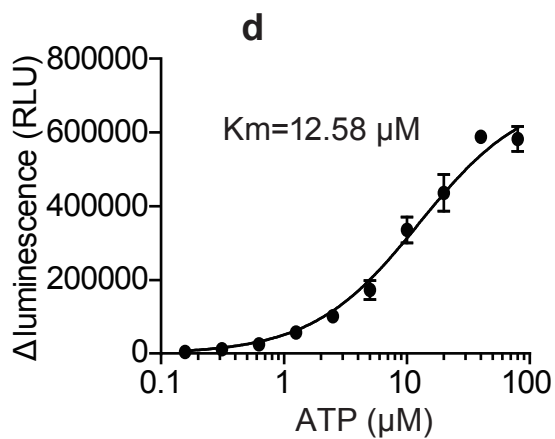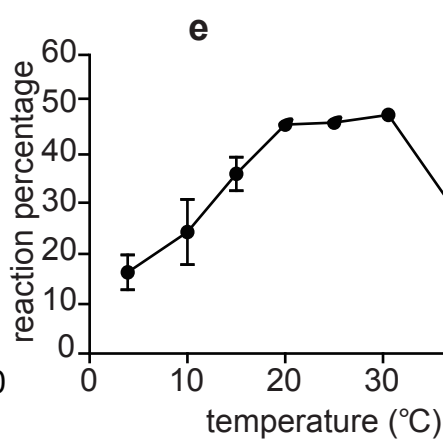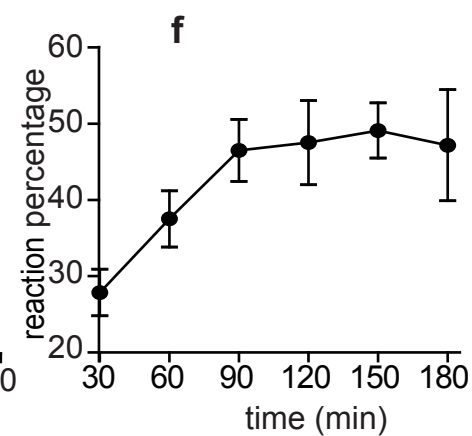

Supplement: cddis2014241x1.pdf [file cddis2014241x1.pdf]

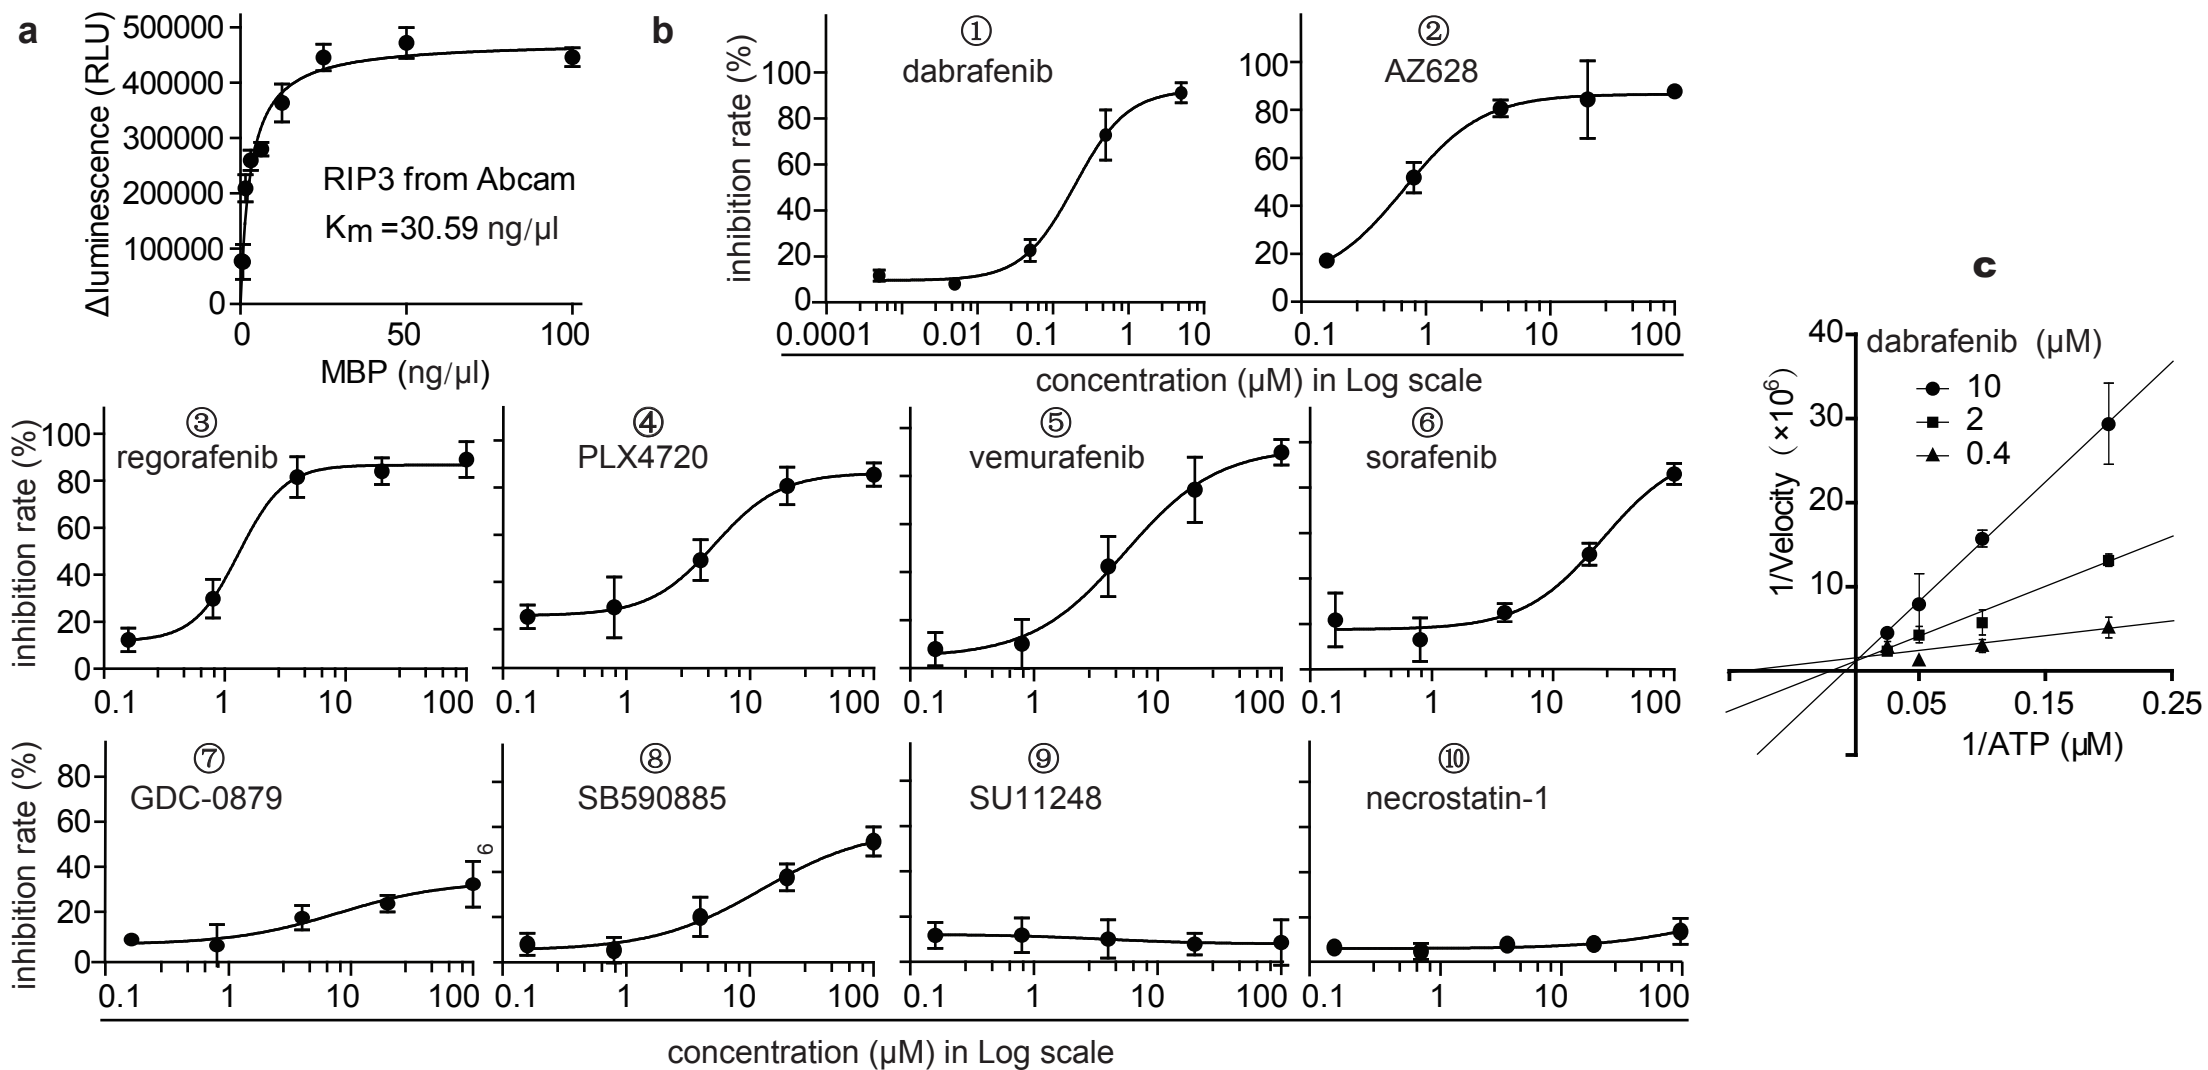

Supplementary Figure S2 by Li JX, *et al.*

Supplement: cddis2014241x2.pdf [file cddis2014241x2.pdf]

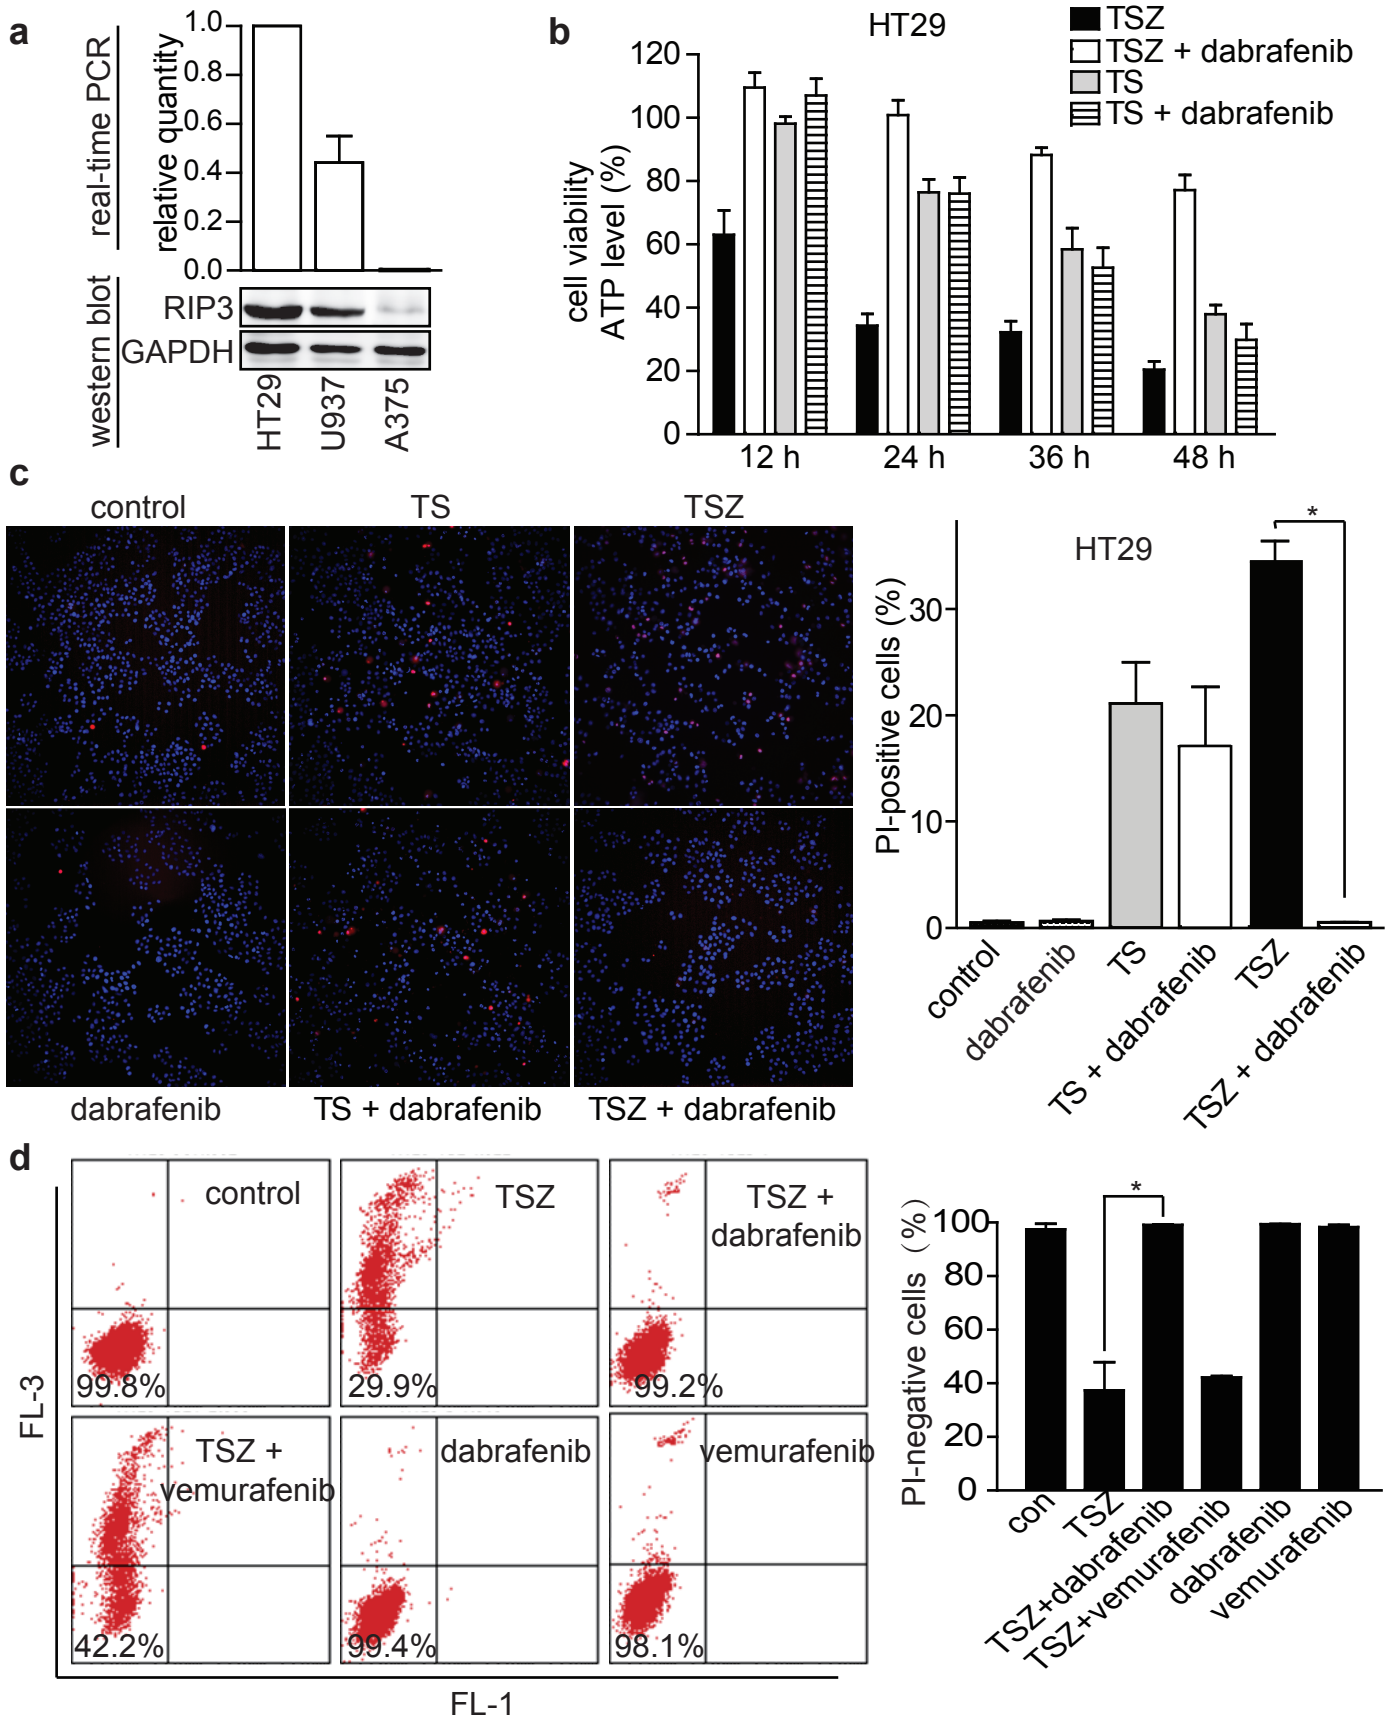

Supplementary Figure S3 by Li JX, *et al.*

Supplement: cddis2014241x3.pdf [file cddis2014241x3.pdf]

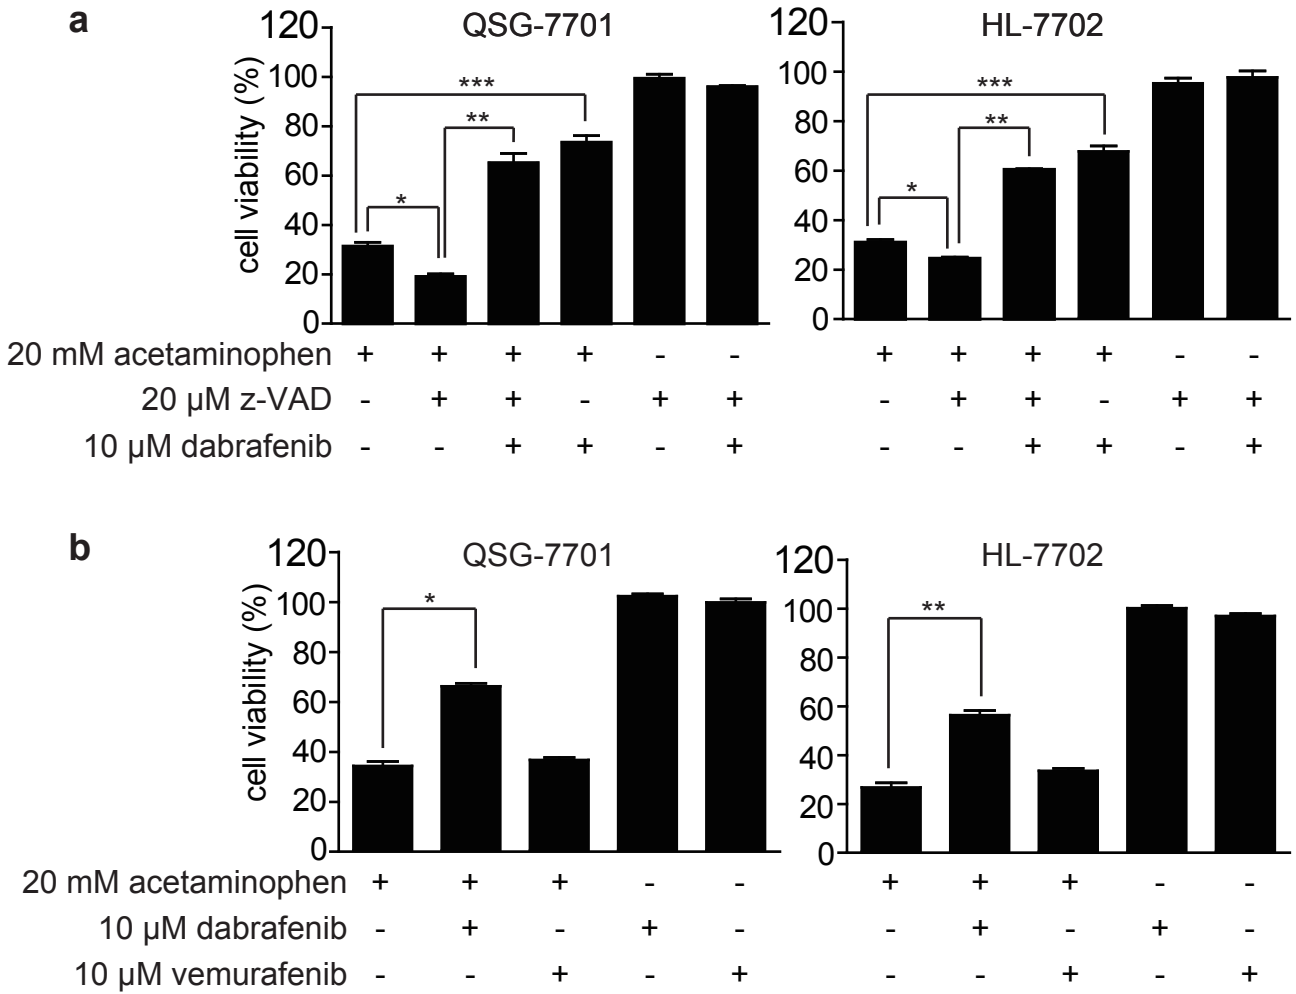

Supplementary Figure S4 by Li JX, *et al.*

Supplement: cddis2014241x4.pdf [file cddis2014241x4.pdf]

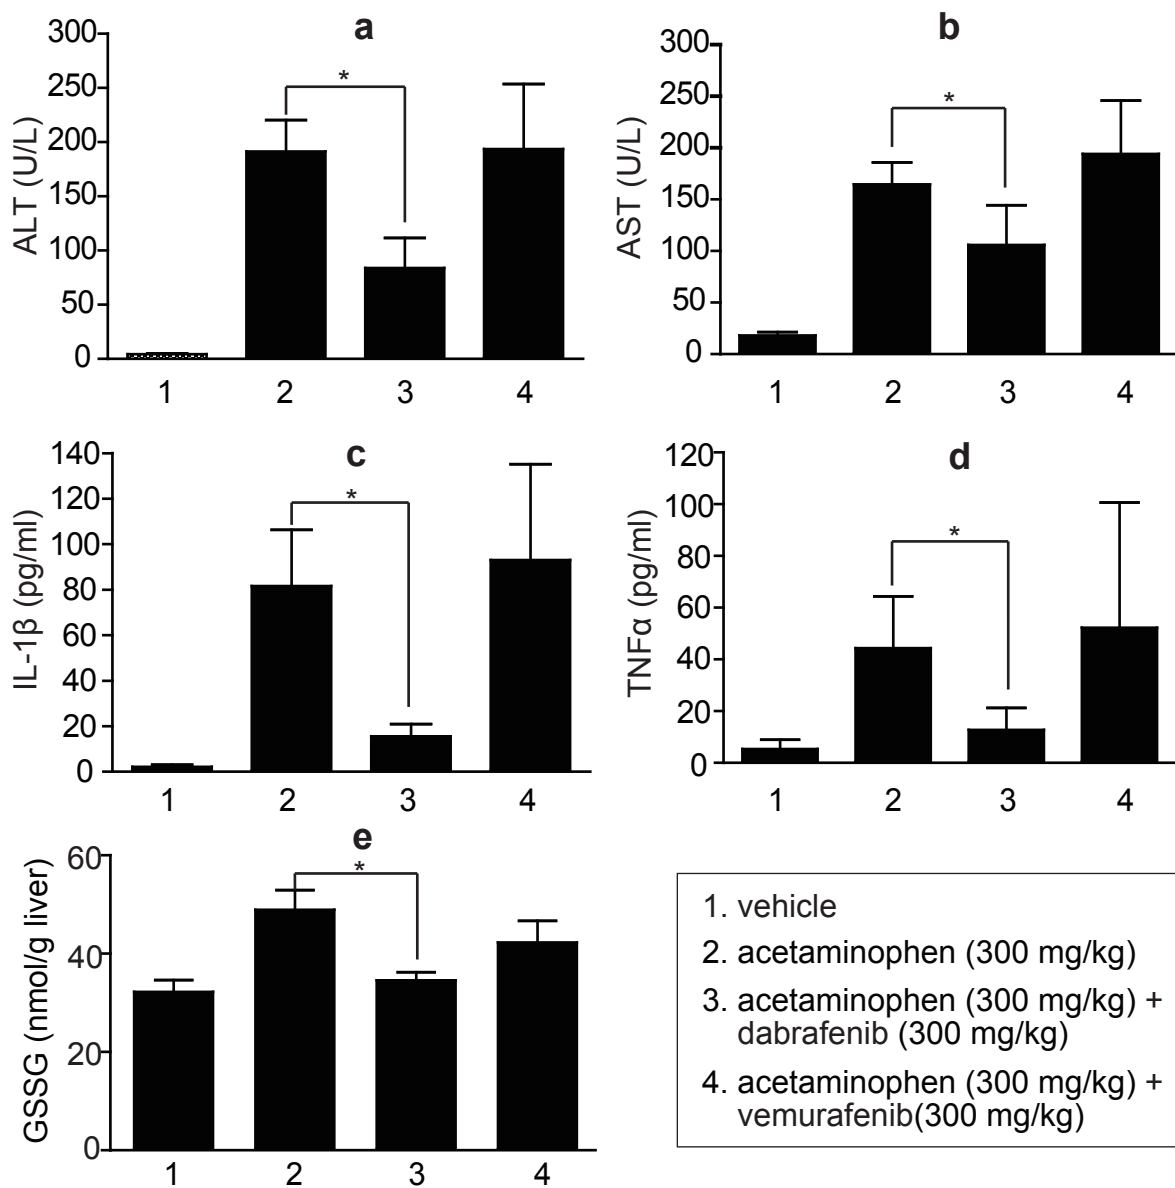

Supplementary Figure S5 by Li JX, *et al.*

Supplement: cddis2014241x5.pdf [file cddis2014241x5.pdf]
